# Supplementary material for: Alterations in gene expressions of Caco-2 cell responses to LPS and ploy(I:C) stimulation
Source: PeerJ. 2023 Jun 7;11:e15459. doi: 10.7717/peerj.15459 (PMC10257391; doi:10.7717/peerj.15459)
Supplement: Data S1 [file peerj-11-15459-s001.xlsx]

## Sheet: Sheet1
Figure 4A	x	y	group				Figure 4B	x	y	group
	ARF6	0.9948	Control					GABARAP	0.9641	Control
	ARF6	1.0673	Control					GABARAP	1.0518	Control
	ARF6	0.9908	Control					GABARAP	0.9973	Control
	ARF6	0.9025	Control					GABARAP	1.152	Control
	ARF6	0.9996	Control					GABARAP	0.9999	Control
	ARF6	0.9927	Control					GABARAP	1.012	Control
	ARF6	0.9926	Control					GABARAP	0.9674	Control
	ARF6	0.7396	Control					GABARAP	1.0074	Control
	ARF6	1.3201	Control					GABARAP	0.8481	Control
	ARF6	0.0704	LPS					GABARAP	0.1999	poly(I:C)
	ARF6	0.2	LPS					GABARAP	0.2504	poly(I:C)
	ARF6	0.1789	LPS					GABARAP	0.2314	poly(I:C)
	ARF6	0.1439	LPS					GABARAP	0.2221	poly(I:C)
	ARF6	0.0842	LPS					GABARAP	0.1326	poly(I:C)
	ARF6	0.1117	LPS					GABARAP	0.2501	poly(I:C)
	ARF6	0.0967	LPS					GABARAP	0.2593	poly(I:C)
	ARF6	0.073	LPS					GABARAP	0.1885	poly(I:C)
	ARF6	0.1213	LPS					GABARAP	0.1343	poly(I:C)
	INHBE	1.1468	Control					LAMTOR3	1.0742	Control
	INHBE	1.0025	Control					LAMTOR3	0.8962	Control
	INHBE	1.0637	Control					LAMTOR3	1.419	Control
	INHBE	0.9649	Control					LAMTOR3	0.9725	Control
	INHBE	0.9354	Control					LAMTOR3	0.7286	Control
	INHBE	1.0522	Control					LAMTOR3	1.1414	Control
	INHBE	1.0334	Control					LAMTOR3	1.0395	Control
	INHBE	1.0153	Control					LAMTOR3	0.9141	Control
	INHBE	0.7858	Control					LAMTOR3	0.8145	Control
	INHBE	0.3076	LPS					LAMTOR3	0.31	poly(I:C)
	INHBE	0.3173	LPS					LAMTOR3	0.5201	poly(I:C)
	INHBE	0.4165	LPS					LAMTOR3	0.366	poly(I:C)
	INHBE	0.4147	LPS					LAMTOR3	0.1889	poly(I:C)
	INHBE	0.309	LPS					LAMTOR3	0.16	poly(I:C)
	INHBE	0.3517	LPS					LAMTOR3	0.1482	poly(I:C)
	INHBE	0.3822	LPS					LAMTOR3	0.3034	poly(I:C)
	INHBE	0.2424	LPS					LAMTOR3	0.3952	poly(I:C)
	INHBE	0.2937	LPS					LAMTOR3	0.2648	poly(I:C)
	SLC39A10	1.147	Control					SPAG7	0.9063	Control
	SLC39A10	0.9835	Control					SPAG7	1.1856	Control
	SLC39A10	0.9634	Control					SPAG7	1.0173	Control
	SLC39A10	1.0337	Control					SPAG7	0.9794	Control
	SLC39A10	1.0332	Control					SPAG7	0.952	Control
	SLC39A10	0.8785	Control					SPAG7	0.813	Control
	SLC39A10	0.9097	Control					SPAG7	1.049	Control
	SLC39A10	1.0568	Control					SPAG7	1.11	Control
	SLC39A10	0.9942	Control					SPAG7	0.9874	Control
	SLC39A10	0.6667	LPS					SPAG7	1.8895	poly(I:C)
	SLC39A10	0.3937	LPS					SPAG7	2.116	poly(I:C)
	SLC39A10	0.6016	LPS					SPAG7	1.6842	poly(I:C)
	SLC39A10	0.41	LPS					SPAG7	1.9769	poly(I:C)
	SLC39A10	0.4064	LPS					SPAG7	1.992	poly(I:C)
	SLC39A10	0.6648	LPS					SPAG7	1.6346	poly(I:C)
	SLC39A10	0.4721	LPS					SPAG7	1.9409	poly(I:C)
	SLC39A10	0.5526	LPS					SPAG7	1.6745	poly(I:C)
	SLC39A10	0.3509	LPS					SPAG7	2.3224	poly(I:C)
	APOBEC3A	1.0866	Control					RUNX2	1.0649	Control
	APOBEC3A	0.9099	Control					RUNX2	0.9818	Control
	APOBEC3A	1.0202	Control					RUNX2	1.048	Control
	APOBEC3A	0.9023	Control					RUNX2	1.012	Control
	APOBEC3A	0.9091	Control					RUNX2	0.9035	Control
	APOBEC3A	0.9134	Control					RUNX2	1.0238	Control
	APOBEC3A	0.9695	Control					RUNX2	1.2135	Control
	APOBEC3A	0.958	Control					RUNX2	0.77	Control
	APOBEC3A	1.331	Control					RUNX2	0.9825	Control
	APOBEC3A	2.9106	LPS					RUNX2	3.4349	poly(I:C)
	APOBEC3A	3.1262	LPS					RUNX2	3.5098	poly(I:C)
	APOBEC3A	3.1799	LPS					RUNX2	3.5994	poly(I:C)
	APOBEC3A	3.4064	LPS					RUNX2	3.3625	poly(I:C)
	APOBEC3A	3.4099	LPS					RUNX2	3.5966	poly(I:C)
	APOBEC3A	3.0997	LPS					RUNX2	3.6945	poly(I:C)
	APOBEC3A	3.4425	LPS					RUNX2	3.6742	poly(I:C)
	APOBEC3A	3.0817	LPS					RUNX2	3.8344	poly(I:C)
	APOBEC3A	3.3599	LPS					RUNX2	3.5771	poly(I:C)
	MT1E	1.058	Control					IFIT2	1.0946	Control
	MT1E	1.0274	Control					IFIT2	0.9896	Control
	MT1E	0.9741	Control					IFIT2	1.0747	Control
	MT1E	1.012	Control					IFIT2	1.0041	Control
	MT1E	1.0568	Control					IFIT2	1.0312	Control
	MT1E	1.0022	Control					IFIT2	0.8148	Control
	MT1E	0.5029	Control					IFIT2	0.9792	Control
	MT1E	1.3309	Control					IFIT2	0.9904	Control
	MT1E	1.0357	Control					IFIT2	1.0214	Control
	MT1E	3.7222	LPS					IFIT2	4.4044	poly(I:C)
	MT1E	3.7312	LPS					IFIT2	4.6512	poly(I:C)
	MT1E	3.6975	LPS					IFIT2	4.3652	poly(I:C)
	MT1E	3.5991	LPS					IFIT2	4.1087	poly(I:C)
	MT1E	3.7259	LPS					IFIT2	4.1757	poly(I:C)
	MT1E	3.5673	LPS					IFIT2	4.4013	poly(I:C)
	MT1E	3.6844	LPS					IFIT2	4.3006	poly(I:C)
	MT1E	3.641	LPS					IFIT2	4.1485	poly(I:C)
	MT1E	3.8402	LPS					IFIT2	4.4146	poly(I:C)
	MT2A	1.1099	Control					PLXNC1	1.1746	Control
	MT2A	0.9728	Control					PLXNC1	0.9471	Control
	MT2A	1.1029	Control					PLXNC1	1.5123	Control
	MT2A	0.9063	Control					PLXNC1	0.9488	Control
	MT2A	0.9908	Control					PLXNC1	0.9049	Control
	MT2A	0.9437	Control					PLXNC1	0.9409	Control
	MT2A	0.9733	Control					PLXNC1	1.0442	Control
	MT2A	0.9993	Control					PLXNC1	0.5206	Control
	MT2A	1.001	Control					PLXNC1	1.0066	Control
	MT2A	4.2824	LPS					PLXNC1	7.7987	poly(I:C)
	MT2A	4.2261	LPS					PLXNC1	7.2101	poly(I:C)
	MT2A	4.1227	LPS					PLXNC1	7.6592	poly(I:C)
	MT2A	4.6113	LPS					PLXNC1	7.3197	poly(I:C)
	MT2A	4.2409	LPS					PLXNC1	8.221	poly(I:C)
	MT2A	4.5455	LPS					PLXNC1	7.7633	poly(I:C)
	MT2A	4.2015	LPS					PLXNC1	7.5375	poly(I:C)
	MT2A	4.3783	LPS					PLXNC1	7.6323	poly(I:C)
	MT2A	4.3678	LPS					PLXNC1	7.4898	poly(I:C)
