# Supplementary material for: Alterations in gene expressions of Caco-2 cell responses to LPS and ploy(I:C) stimulation
Source: PeerJ. 2023 Jun 7;11:e15459. doi: 10.7717/peerj.15459 (PMC10257391; doi:10.7717/peerj.15459)
Supplement: Table S1 [file peerj-11-15459-s005.xlsx]

## Sheet: Sheet1
Table S1 Differentially expressed genes (DEGs) in Caco-2 cells under LPS stimulation
Genes		LPS		Control		Log2(fold change)	P value
Homo_sapiens_newGene_27876	Homo_sapiens_newGene_27876	0.1736±0.0054	0.1736±0.0054	188.11±80.27	188.11±80.27	-10.08	6.69e-11
Homo_sapiens_newGene_693	Homo_sapiens_newGene_693	0.1737±0.01	0.1737±0.01	154.97±49.15	154.97±49.15	-9.8	5.62e-11
ARF6	ARF6	242.3±31.98	242.3±31.98	4187.6±1770.93	4187.6±1770.93	-4.11	3.52e-23
KLHDC7B	KLHDC7B	33.45±7.26	33.45±7.26	240.57±154.75	240.57±154.75	-2.85	0.00055
TVP23C-CDRT4	TVP23C-CDRT4	66.93±64.08	66.93±64.08	352.77±118.72	352.77±118.72	-2.4	0.035
Homo_sapiens_newGene_10309	Homo_sapiens_newGene_10309	32.98±13.03	32.98±13.03	162.8±37.95	162.8±37.95	-2.31	3.17e-05
HNF4A	HNF4A	236.06±40.2	236.06±40.2	956.98±563.22	956.98±563.22	-2.02	0.0011
KIAA0753	KIAA0753	284.98±166.08	284.98±166.08	1149.64±264.55	1149.64±264.55	-2.01	0.00088
CALHM2	CALHM2	110.41±23.43	110.41±23.43	397.44±17.73	397.44±17.73	-1.85	7.58e-11
FAM161B	FAM161B	66.59±29.99	66.59±29.99	234.48±81.85	234.48±81.85	-1.82	0.014
SCAI	SCAI	123.49±26.89	123.49±26.89	419.86±138.48	419.86±138.48	-1.77	9.85e-05
Homo_sapiens_newGene_30989	Homo_sapiens_newGene_30989	280.33±121	280.33±121	910.29±416.92	910.29±416.92	-1.7	0.03
PGRMC2	PGRMC2	869.96±222.55	869.96±222.55	2759.88±567.55	2759.88±567.55	-1.67	5.29e-07
PTGR2	PTGR2	250.37±58.27	250.37±58.27	759.68±258.24	759.68±258.24	-1.6	0.00052
SLC39A10	SLC39A10	452.95±6.6	452.95±6.6	1320.54±404.79	1320.54±404.79	-1.54	5.01e-06
TXNIP	TXNIP	1122.04±108.96	1122.04±108.96	3262.37±978.24	3262.37±978.24	-1.54	1.11e-05
NUPR1	NUPR1	107.57±3.9	107.57±3.9	310.61±69.49	310.61±69.49	-1.53	5.74e-06
EPDR1	EPDR1	962.57±225.9	962.57±225.9	2720.79±1371.24	2720.79±1371.24	-1.5	0.029
INHBE	INHBE	52.34±8.92	52.34±8.92	147.41±29.48	147.41±29.48	-1.49	0.001
MAOA	MAOA	21.11±4.98	21.11±4.98	58±6.18	58±6.18	-1.46	0.035
SYNE1	SYNE1	101.15±13.27	101.15±13.27	273.98±48.95	273.98±48.95	-1.44	1.8e-05
FRMD8	FRMD8	731.57±125.27	731.57±125.27	1953.26±741.71	1953.26±741.71	-1.42	0.0056
RBM38	RBM38	1256.46±300.82	1256.46±300.82	3303.94±297.2	3303.94±297.2	-1.39	3.53e-07
NDE1	NDE1	354.46±69.6	354.46±69.6	905.84±434.99	905.84±434.99	-1.35	0.033
GPR1	GPR1	298.52±21.44	298.52±21.44	758.78±215.35	758.78±215.35	-1.35	0.00027
Homo_sapiens_newGene_13267	Homo_sapiens_newGene_13267	365.3±58.61	365.3±58.61	927.19±238.86	927.19±238.86	-1.34	0.00026
LAMP3	LAMP3	541.21±24.95	541.21±24.95	1357.67±236.07	1357.67±236.07	-1.33	2.43e-09
PKD2	PKD2	309.81±85.95	309.81±85.95	773.98±119.07	773.98±119.07	-1.32	0.00058
ENTPD5	ENTPD5	441.73±195.53	441.73±195.53	1064.68±188.96	1064.68±188.96	-1.27	0.03
TSC22D1	TSC22D1	2442.77±732.51	2442.77±732.51	5873.67±1450.43	5873.67±1450.43	-1.27	0.0033
ABCA12	ABCA12	80.27±15.21	80.27±15.21	191.39±14.09	191.39±14.09	-1.25	0.00051
PLEKHG1	PLEKHG1	207.85±19.23	207.85±19.23	489.49±63.04	489.49±63.04	-1.24	2.86e-07
ATP8B2	ATP8B2	599.01±25.44	599.01±25.44	1339.22±208.5	1339.22±208.5	-1.16	8.66e-08
TSC22D3	TSC22D3	754.5±230.65	754.5±230.65	1673.78±186.91	1673.78±186.91	-1.15	0.0027
SLC22A11	SLC22A11	36.57±5.62	36.57±5.62	81.02±3.88	81.02±3.88	-1.15	0.031
FAM167A	FAM167A	41.36±3.7	41.36±3.7	91.19±16.22	91.19±16.22	-1.14	0.039
ADM2	ADM2	846.92±64.17	846.92±64.17	1851.24±319.18	1851.24±319.18	-1.13	7.59e-07
ABCG1	ABCG1	70.47±15.65	70.47±15.65	152.56±18.88	152.56±18.88	-1.12	0.02
KRT3	KRT3	112.16±20.41	112.16±20.41	241.34±55.85	241.34±55.85	-1.11	0.024
HERPUD1	HERPUD1	4522.27±849.12	4522.27±849.12	9716.67±2353.37	9716.67±2353.37	-1.1	0.0022
FMR1	FMR1	844.41±299.51	844.41±299.51	1792.08±347.21	1792.08±347.21	-1.09	0.048
FICD	FICD	351.23±88.52	351.23±88.52	743.15±53.09	743.15±53.09	-1.08	0.0029
CDKN2B	CDKN2B	114.6±8	114.6±8	241.63±45.79	241.63±45.79	-1.08	0.0036
SEL1L	SEL1L	3498.86±252.07	3498.86±252.07	7347.45±1193.46	7347.45±1193.46	-1.07	4.89e-07
NOP9	NOP9	2270.95±86.52	2270.95±86.52	4728.54±1492.59	4728.54±1492.59	-1.06	0.0062
XDH	XDH	348.88±47.11	348.88±47.11	723.87±190.99	723.87±190.99	-1.05	0.0072
GCLC	GCLC	1604.46±226.1	1604.46±226.1	3302.87±618.7	3302.87±618.7	-1.04	0.00025
MKX	MKX	213.36±20.6	213.36±20.6	431.78±69.39	431.78±69.39	-1.02	0.00052
TMEM39A	TMEM39A	996.74±357.75	996.74±357.75	2016.08±188.34	2016.08±188.34	-1.02	0.047
ANK2	ANK2	65.84±7.43	65.84±7.43	133.1±22.52	133.1±22.52	-1.02	0.038
SLIT1	SLIT1	192.05±36.14	192.05±36.14	385.51±75.48	385.51±75.48	-1	0.019
Homo_sapiens_newGene_35629	Homo_sapiens_newGene_35629	117.16±14	117.16±14	234.72±43.11	234.72±43.11	-1	0.013
DUSP2	DUSP2	1190.09±44.78	1190.09±44.78	581.75±117.72	581.75±117.72	1.03	6.05e-05
SPIRE1	SPIRE1	1616.95±382.7	1616.95±382.7	787.14±144.9	787.14±144.9	1.04	0.0073
C5orf28	C5orf28	830.14±129.42	830.14±129.42	393.08±124.92	393.08±124.92	1.08	0.019
PMF1-BGLAP	PMF1-BGLAP	593.13±98.31	593.13±98.31	276.45±97.92	276.45±97.92	1.1	0.042
ANGEL1	ANGEL1	1170.16±306.08	1170.16±306.08	414.73±68.49	414.73±68.49	1.5	2.86e-05
APOBEC3A	APOBEC3A	194±18.9	194±18.9	68.72±33.18	68.72±33.18	1.5	0.025
MT1F	MT1F	1445.43±169.93	1445.43±169.93	506.39±58.72	506.39±58.72	1.51	4.64e-14
MT1X	MT1X	4297.7±1143.21	4297.7±1143.21	1287.65±313.06	1287.65±313.06	1.74	3.3e-06
KIAA0513	KIAA0513	257.15±133.63	257.15±133.63	70.46±23.85	70.46±23.85	1.87	0.048
MT2A	MT2A	53866.86±5931.01	53866.86±5931.01	13714.27±6697.26	13714.27±6697.26	1.97	2.67e-05
MT1E	MT1E	31761.16±5064.22	31761.16±5064.22	6920.4±2652.96	6920.4±2652.96	2.2	1.09e-08
LIMS1	LIMS1	6759.52±262.06	6759.52±262.06	1428.21±420.44	1428.21±420.44	2.24	3.52e-14
SPAG7	SPAG7	1965.28±549.74	1965.28±549.74	387.77±158.9	387.77±158.9	2.34	1.82e-07
RP4-539M6.19	RP4-539M6.19	802.86±74.67	802.86±74.67	149.52±32.71	149.52±32.71	2.42	9.15e-22
RPL17-C18orf32	RPL17-C18orf32	2036.98±1251.7	2036.98±1251.7	365.5±45.2	365.5±45.2	2.48	0.00052
ZBTB7C	ZBTB7C	878.59±79.65	878.59±79.65	153.65±107.79	153.65±107.79	2.51	0.0092
Homo_sapiens_newGene_1686	Homo_sapiens_newGene_1686	114.48±22.77	114.48±22.77	2.01±2.69	2.01±2.69	5.8	3.98e-09
Homo_sapiens_newGene_9169	Homo_sapiens_newGene_9169	136.91±107.38	136.91±107.38	0.19±0.01	0.19±0.01	9.48	8.66e-08
