# Supplementary material for: Alterations in gene expressions of Caco-2 cell responses to LPS and ploy(I:C) stimulation
Source: PeerJ. 2023 Jun 7;11:e15459. doi: 10.7717/peerj.15459 (PMC10257391; doi:10.7717/peerj.15459)
Supplement: Table S2 [file peerj-11-15459-s002.xlsx]

## Sheet: Sheet1
Table S2 Differentially expressed genes (DEGs) in Caco-2 cells under poly(I:C) stimulation
Genes		poly(I:C)		Control		Log2(fold change)	P value
GABARAP	GABARAP	346.01±105.01	346.01±105.01	2938.04±1441.82	2938.04±1441.82	-3.09	9.26e-10
PDIK1L	PDIK1L	55.17±13.64	55.17±13.64	403.04±179.47	403.04±179.47	-2.86	1.01e-07
SMIM15	SMIM15	631.42±241.77	631.42±241.77	3545.19±184.21	3545.19±184.21	-2.49	9.91e-12
ZBTB42	ZBTB42	145.6±37.3	145.6±37.3	403.47±85.11	403.47±85.11	-1.47	0.00049
SLC16A5	SLC16A5	473.84±62.6	473.84±62.6	1267.73±440.51	1267.73±440.51	-1.42	0.0024
RALGAPA2	RALGAPA2	174.39±69.62	174.39±69.62	440.03±14.36	440.03±14.36	-1.34	0.031
SMNDC1	SMNDC1	1001.93±61.85	1001.93±61.85	2203.14±760.81	2203.14±760.81	-1.14	0.05
LAMTOR3	LAMTOR3	594.83±96.31	594.83±96.31	1303.67±160.39	1303.67±160.39	-1.13	1.8e-05
SH3BP5L	SH3BP5L	1281.43±90.22	1281.43±90.22	555.93±49.56	555.93±49.56	1.2	5.19e-12
SPAG7	SPAG7	1285.56±553.18	1285.56±553.18	462.79±31.96	462.79±31.96	1.47	0.0024
RNMT	RNMT	950.19±333.98	950.19±333.98	333.54±122.77	333.54±122.77	1.51	0.014
BLOC1S6	BLOC1S6	924.38±575.99	924.38±575.99	243.2±53.55	243.2±53.55	1.93	0.0099
RUNX2	RUNX2	2648.69±734.95	2648.69±734.95	640.29±354.25	640.29±354.25	2.05	0.00044
IFIT2	IFIT2	188.75±16.83	188.75±16.83	36.31±17.93	36.31±17.93	2.37	7.88e-06
PRNP	PRNP	2630.05±2070.39	2630.05±2070.39	399.17±183.17	399.17±183.17	2.72	0.0038
PLXNC1	PLXNC1	1166.22±998.64	1166.22±998.64	126.75±2.56	126.75±2.56	3.2	0.0048
ZNF440	ZNF440	233.51±180.03	233.51±180.03	12.04±5.71	12.04±5.71	4.27	5.11e-06
