# Supplementary material for: Alterations in gene expressions of Caco-2 cell responses to LPS and ploy(I:C) stimulation
Source: PeerJ. 2023 Jun 7;11:e15459. doi: 10.7717/peerj.15459 (PMC10257391; doi:10.7717/peerj.15459)
Supplement: Table S3 [file peerj-11-15459-s006.xlsx]

## Sheet: Sheet1
Table S3 GO annotation of DEGs response to LPS and poly(I:C) exposure
Stimulation group		Functional item		Genes		Log2(fold change)
LPS		BP:biological adhesion	BP:biological adhesion	LIMS1	LIMS1	2.24
		BP:biological regulation		FMR1	FMR1	-1.09
		BP:biological regulation		DUSP2	DUSP2	1.03
		BP:biological regulation		NUPR1	NUPR1	-1.53
		BP:biological regulation		INHBE	INHBE	-1.5
		BP:biological regulation		MKX	MKX	-1.02
		BP:biological regulation		HNF4A	HNF4A	-2.02
		BP:biological regulation		TMEM39A	TMEM39A	-1.02
		BP:biological regulation		SPIRE1	SPIRE1	1.04
		BP:biological regulation		PKD2	PKD2	-1.32
		BP:biological regulation		ABCG1	ABCG1	-1.12
		BP:biological regulation		PKD2	PKD2	-1.32
		BP:biological regulation		MT2A	MT2A	1.97
		BP:biological regulation		HERPUD1	HERPUD1	-1.1
		BP:biological regulation		ATP8B2	ATP8B2	-1.16
		BP:biological regulation		MT1F	MT1F	1.51
		BP:biological regulation		ZBTB7C	ZBTB7C	2.51
		BP:biological regulation		MT1E	MT1E	2.2
		BP:biological regulation		LIMS1	LIMS1	2.24
		BP:biological regulation		GPR1	GPR1	-1.35
		BP:biological regulation		SLC39A10	SLC39A10	-1.54
		BP:biological regulation		APOBEC3A	APOBEC3A	1.5
		BP:cellular process		FMR1	FMR1	-1.09
		BP:cellular process		DUSP2	DUSP2	1.03
		BP:cellular process		XDH	XDH	-1.05
		BP:cellular process		NUPR1	NUPR1	-1.53
		BP:cellular process		INHBE	INHBE	-1.5
		BP:cellular process		MKX	MKX	-1.02
		BP:cellular process		HNF4A	HNF4A	-2.02
		BP:cellular process		TMEM39A	TMEM39A	-1.02
		BP:cellular process		SPIRE1	SPIRE1	1.04
		BP:cellular process		PKD2	PKD2	-1.32
		BP:cellular process		ANK2	ANK2	-1.02
		BP:cellular process		MT2A	MT2A	1.97
		BP:cellular process		HERPUD1	HERPUD1	-1.1
		BP:cellular process		ATP8B2	ATP8B2	-1.16
		BP:cellular process		ARF6	ARF6	-4.11
		BP:cellular process		MT1F	MT1F	1.51
		BP:cellular process		ZBTB7C	ZBTB7C	2.51
		BP:cellular process		MT1E	MT1E	2.2
		BP:cellular process		PTGR2	PTGR2	-1.6
		BP:cellular process		NDE1	NDE1	-1.35
		BP:cellular process		LIMS1	LIMS1	2.24
		BP:cellular process		GCLC	GCLC	-1.04
		BP:cellular process		GPR1	GPR1	-1.35
		BP:cellular process		NOP9	NOP9	-1.06
		BP:cellular process		SLC39A10	SLC39A10	-1.54
		BP:cellular process		SLIT1	SLIT1	-1
		BP:cellular process		APOBEC3A	APOBEC3A	1.5
		BP:cellular process		FAM161B	FAM161B	-1.82
		BP:cellular process		LAMP3	LAMP3	-1.33
		BP:developmental process	BP:developmental process	FMR1	FMR1	-1.09
		BP:developmental process	BP:developmental process	DUSP2	DUSP2	1.03
		BP:developmental process	BP:developmental process	MKX	MKX	-1.02
		BP:developmental process	BP:developmental process	HNF4A	HNF4A	-2.02
		BP:developmental process	BP:developmental process	LIMS1	LIMS1	2.24
		BP:developmental process	BP:developmental process	SLIT1	SLIT1	-1
		BP:immune system process	BP:immune system process	SLC39A10	SLC39A10	-1.54
		BP:immune system process	BP:immune system process	APOBEC3A	APOBEC3A	1.5
		BP:interspecies interaction between organisms		APOBEC3A	APOBEC3A	1.5
		BP:localization	BP:localization	FMR1	FMR1	-1.09
		BP:localization	BP:localization	TXNIP	TXNIP	-1.54
		BP:localization	BP:localization	ABCA12	ABCA12	-1.25
		BP:localization	BP:localization	SPIRE1	SPIRE1	1.04
		BP:localization	BP:localization	PKD2	PKD2	-1.32
		BP:localization	BP:localization	ANK2	ANK2	-1.02
		BP:localization	BP:localization	ATP8B2	ATP8B2	-1.16
		BP:localization	BP:localization	ARF6	ARF6	-4.11
		BP:localization	BP:localization	SLC22A11	SLC22A11	-1.15
		BP:localization	BP:localization	NDE1	NDE1	-1.35
		BP:localization	BP:localization	NOP9	NOP9	-1.06
		BP:localization	BP:localization	SLC39A10	SLC39A10	-1.54
		BP:localization	BP:localization	LAMP3	LAMP3	-1.33
		BP:locomotion		NDE1	NDE1	-1.35
		BP:locomotion		SLIT1	SLIT1	-1
		BP:metabolic process		FMR1	FMR1	-1.09
		BP:metabolic process		DUSP2	DUSP2	1.03
		BP:metabolic process		XDH	XDH	-1.05
		BP:metabolic process		INHBE	INHBE	-1.5
		BP:metabolic process		MKX	MKX	-1.02
		BP:metabolic process		HNF4A	HNF4A	-2.02
		BP:metabolic process		TMEM39A	TMEM39A	-1.02
		BP:metabolic process		HERPUD1	HERPUD1	-1.1
		BP:metabolic process		ZBTB7C	ZBTB7C	2.51
		BP:metabolic process		PTGR2	PTGR2	-1.6
		BP:metabolic process		GCLC	GCLC	-1.04
		BP:metabolic process		NOP9	NOP9	-1.06
		BP:metabolic process		APOBEC3A	APOBEC3A	1.5
		BP:multi-organism process		SPIRE1	SPIRE1	1.04
		BP:multicellular organismal process		FMR1	FMR1	-1.09
		BP:multicellular organismal process		DUSP2	DUSP2	1.03
		BP:multicellular organismal process		SPIRE1	SPIRE1	1.04
		BP:multicellular organismal process		SLIT1	SLIT1	-1
		BP:reproduction		SPIRE1	SPIRE1	1.04
		BP:reproductive process		SPIRE1	SPIRE1	1.04
		BP:response to stimulus		FMR1	FMR1	-1.09
		BP:response to stimulus		DUSP2	DUSP2	1.03
		BP:response to stimulus		INHBE	INHBE	-1.5
		BP:response to stimulus		PKD2	PKD2	-1.32
		BP:response to stimulus		MT2A	MT2A	1.97
		BP:response to stimulus		HERPUD1	HERPUD1	-1.1
		BP:response to stimulus		MT1F	MT1F	1.51
		BP:response to stimulus		MT1E	MT1E	2.2
		BP:response to stimulus		LIMS1	LIMS1	2.24
		BP:response to stimulus		GPR1	GPR1	-1.35
		BP:response to stimulus		SLC39A10	SLC39A10	-1.54
		BP:response to stimulus		SLIT1	SLIT1	-1
		BP:response to stimulus		APOBEC3A	APOBEC3A	1.5
		BP:signaling		FMR1	FMR1	-1.09
		BP:signaling		DUSP2	DUSP2	1.03
		BP:signaling		INHBE	INHBE	-1.5
		BP:signaling		PKD2	PKD2	-1.32
		BP:signaling		HERPUD1	HERPUD1	-1.1
		BP:signaling		LIMS1	LIMS1	2.24
		BP:signaling		GPR1	GPR1	-1.35
		BP:signaling		SLC39A10	SLC39A10	-1.54
		CC:cellular anatomical entity		FMR1	FMR1	-1.09
		CC:cellular anatomical entity		CALHM2	CALHM2	-1.85
		CC:cellular anatomical entity		TXNIP	TXNIP	-1.54
		CC:cellular anatomical entity		DUSP2	DUSP2	1.03
		CC:cellular anatomical entity		XDH	XDH	-1.05
		CC:cellular anatomical entity		NUPR1	NUPR1	-1.53
		CC:cellular anatomical entity		ABCA12	ABCA12	-1.25
		CC:cellular anatomical entity		EPDR1	EPDR1	-1.5
		CC:cellular anatomical entity		INHBE	INHBE	-1.49
		CC:cellular anatomical entity		MKX	MKX	-1.02
		CC:cellular anatomical entity		HNF4A	HNF4A	-2.02
		CC:cellular anatomical entity		TMEM39A	TMEM39A	-1.02
		CC:cellular anatomical entity		SPIRE1	SPIRE1	1.04
		CC:cellular anatomical entity		RBM38	RBM38	-1.39
		CC:cellular anatomical entity		ABCG1	ABCG1	-1.12
		CC:cellular anatomical entity		PKD2	PKD2	-1.32
		CC:cellular anatomical entity		PGRMC2	PGRMC2	-1.67
		CC:cellular anatomical entity		ANK2	ANK2	-1.02
		CC:cellular anatomical entity		MT2A	MT2A	1.97
		CC:cellular anatomical entity		HERPUD1	HERPUD1	-1.1
		CC:cellular anatomical entity		ATP8B2	ATP8B2	-1.16
		CC:cellular anatomical entity		ARF6	ARF6	-4.11
		CC:cellular anatomical entity		MT1F	MT1F	1.51
		CC:cellular anatomical entity		ZBTB7C	ZBTB7C	2.51
		CC:cellular anatomical entity		MT1E	MT1E	2.2
		CC:cellular anatomical entity		SCAI	SCAI	-1.77
		CC:cellular anatomical entity		NDE1	NDE1	-1.35
		CC:cellular anatomical entity		LIMS1	LIMS1	2.24
		CC:cellular anatomical entity		GPR1	GPR1	-1.35
		CC:cellular anatomical entity		NOP9	NOP9	-1.06
		CC:intracellular		FMR1	FMR1	-1.09
		CC:intracellular		TXNIP	TXNIP	-1.54
		CC:intracellular		DUSP2	DUSP2	1.03
		CC:intracellular		XDH	XDH	-1.05
		CC:intracellular		NUPR1	NUPR1	-1.53
		CC:intracellular		ABCA12	ABCA12	-1.25
		CC:intracellular		EPDR1	EPDR1	-1.5
		CC:intracellular		MKX	MKX	-1.02
		CC:intracellular		HNF4A	HNF4A	-2.02
		CC:intracellular		TMEM39A	TMEM39A	-1.02
		CC:intracellular		SPIRE1	SPIRE1	1.04
		CC:intracellular		RBM38	RBM38	-1.39
		CC:intracellular		PGRMC2	PGRMC2	-1.67
		CC:intracellular		MT2A	MT2A	1.97
		CC:intracellular		HERPUD1	HERPUD1	-1.1
		CC:intracellular		ARF6	ARF6	-4.11
		CC:intracellular		MT1F	MT1F	1.51
		CC:intracellular		ZBTB7C	ZBTB7C	2.51
		CC:intracellular		MT1E	MT1E	2.2
		CC:intracellular		SCAI	SCAI	-1.77
		CC:intracellular		NDE1	NDE1	-1.35
		CC:intracellular		LIMS1	LIMS1	2.24
		CC:intracellular		NOP9	NOP9	-1.06
		CC:intracellular		APOBEC3A	APOBEC3A	1.5
		CC:intracellular		LAMP3	LAMP3	-1.33
		CC:protein-containing complex		FMR1	FMR1	-1.09
		CC:protein-containing complex		NDE1	NDE1	-1.35
		CC:protein-containing complex		NOP9	NOP9	-1.06
		CC:protein-containing complex		FAM161B	FAM161B	-1.82
		MF:binding		FMR1	FMR1	-1.09
		MF:binding		TXNIP	TXNIP	-1.54
		MF:binding		DUSP2	DUSP2	1.03
		MF:binding		XDH	XDH	-1.05
		MF:binding		PLEKHG1	PLEKHG1	-1.24
		MF:binding		ABCA12	ABCA12	-1.25
		MF:binding		INHBE	INHBE	-1.49
		MF:binding		MKX	MKX	-1.02
		MF:binding		HNF4A	HNF4A	-2.02
		MF:binding		PKD2	PKD2	-1.32
		MF:binding		ANK2	ANK2	-1.02
		MF:binding		MT2A	MT2A	1.97
		MF:binding		HERPUD1	HERPUD1	-1.1
		MF:binding		ARF6	ARF6	-4.11
		MF:binding		MT1F	MT1F	1.51
		MF:binding		ZBTB7C	ZBTB7C	2.51
		MF:binding		MT1E	MT1E	2.2
		MF:binding		NDE1	NDE1	-1.35
		MF:binding		GPR1	GPR1	-1.35
		MF:binding		NOP9	NOP9	-1.06
		MF:binding		SLIT1	SLIT1	-1
		MF:binding		APOBEC3A	APOBEC3A	1.5
		MF:catalytic activity		DUSP2	DUSP2	1.03
		MF:catalytic activity		XDH	XDH	-1.05
		MF:catalytic activity		ABCA12	ABCA12	-1.25
		MF:catalytic activity		ANGEL1	ANGEL1	1.5
		MF:catalytic activity		ABCG1	ABCG1	-1.12
		MF:catalytic activity		ATP8B2	ATP8B2	-1.16
		MF:catalytic activity		PTGR2	PTGR2	-1.6
		MF:catalytic activity		GCLC	GCLC	-1.04
		MF:catalytic activity		APOBEC3A	APOBEC3A	1.5
		MF:molecular adaptor activity		ANK2	ANK2	-1.02
		MF:molecular function regulator		PLEKHG1	PLEKHG1	-1.24
		MF:molecular function regulator		INHBE	INHBE	-1.49
		MF:molecular function regulator		MKX	MKX	-1.02
		MF:molecular function regulator		HNF4A	HNF4A	-2.02
		MF:molecular function regulator		ZBTB7C	ZBTB7C	2.51
		MF:molecular function regulator		SCAI	SCAI	-1.77
		MF:molecular transducer activity		GPR1	GPR1	-1.35
		MF:transporter activity		CALHM2	CALHM2	-1.85
		MF:transporter activity		ABCA12	ABCA12	-1.25
		MF:transporter activity		ABCG1	ABCG1	-1.12
		MF:transporter activity		PKD2	PKD2	-1.32
		MF:transporter activity		ATP8B2	ATP8B2	-1.16
		MF:transporter activity		SLC39A10	SLC39A10	-1.54
poly(I:C)		BP:biological adhesion		PLXNC1	PLXNC1	3.2
		BP:biological regulation		PLXNC1	PLXNC1	3.2
		BP:biological regulation		ZNF440	ZNF440	4.27
		BP:biological regulation		LAMTOR3	LAMTOR3	-1.13
		BP:biological regulation		SH3BP5L	SH3BP5L	1.2
		BP:biological regulation		ZBTB42	ZBTB42	-1.47
		BP:biological regulation		RUNX2	RUNX2	2.05
		BP:cellular process		RNMT	RNMT	1.51
		BP:cellular process		PLXNC1	PLXNC1	3.2
		BP:cellular process		ZNF440	ZNF440	4.27
		BP:cellular process		LAMTOR3	LAMTOR3	-1.13
		BP:cellular process		SH3BP5L	SH3BP5L	1.2
		BP:cellular process		ZBTB42	ZBTB42	-1.47
		BP:cellular process		GABARAP	GABARAP	-3.09
		BP:cellular process		RUNX2	RUNX2	2.05
		BP:cellular process		BLOC1S6	BLOC1S6	1.93
		BP:developmental process		PLXNC1	PLXNC1	3.2
		BP:developmental process		RUNX2	RUNX2	2.05
		BP:immune system process		IFIT2	IFIT2	2.37
		BP:immune system process		RUNX2	RUNX2	2.05
		BP:interspecies interaction between organisms		IFIT2	IFIT2	2.37
		BP:localization		SLC16A5	SLC16A5	-1.42
		BP:localization		PLXNC1	PLXNC1	3.2
		BP:localization		BLOC1S6	BLOC1S6	1.93
		BP:locomotion		PLXNC1	PLXNC1	3.2
		BP:metabolic process		RNMT	RNMT	1.51
		BP:metabolic process		ZNF440	ZNF440	4.27
		BP:metabolic process		SH3BP5L	SH3BP5L	1.2
		BP:metabolic process		ZBTB42	ZBTB42	-1.47
		BP:metabolic process		GABARAP	GABARAP	-3.09
		BP:metabolic process		RUNX2	RUNX2	2.05
		BP:multicellular organismal process		PLXNC1	PLXNC1	3.2
		BP:multicellular organismal process		RUNX2	RUNX2	2.05
		BP:response to stimulus		IFIT2	IFIT2	2.37
		BP:response to stimulus		PLXNC1	PLXNC1	3.2
		BP:signaling		LAMTOR3	LAMTOR3	-1.13
		BP:signaling		SH3BP5L	SH3BP5L	1.2
		BP:signaling		GABARAP	GABARAP	-3.09
		BP:signaling		PLXNC1	PLXNC1	3.2
		BP:signaling		LAMTOR3	LAMTOR3	-1.13
		BP:signaling		SH3BP5L	SH3BP5L	1.2
		CC:cellular anatomical entity		RNMT	RNMT	1.51
		CC:cellular anatomical entity		IFIT2	IFIT2	2.37
		CC:cellular anatomical entity		SLC16A5	SLC16A5	-1.42
		CC:cellular anatomical entity		SMNDC1	SMNDC1	-1.14
		CC:cellular anatomical entity		PLXNC1	PLXNC1	3.2
		CC:cellular anatomical entity		ZNF440	ZNF440	4.27
		CC:cellular anatomical entity		LAMTOR3	LAMTOR3	-1.13
		CC:cellular anatomical entity		RALGAPA2	RALGAPA2	-1.34
		CC:cellular anatomical entity		SH3BP5L	SH3BP5L	1.2
		CC:cellular anatomical entity		ZBTB42	ZBTB42	-1.47
		CC:cellular anatomical entity		GABARAP	GABARAP	-3.09
		CC:cellular anatomical entity		RUNX2	RUNX2	2.05
		CC:cellular anatomical entity		BLOC1S6	BLOC1S6	1.93
		CC:intracellular		RNMT	RNMT	1.51
		CC:intracellular		IFIT2	IFIT2	2.37
		CC:intracellular		SMNDC1	SMNDC1	-1.14
		CC:intracellular		ZNF440	ZNF440	4.27
		CC:intracellular		LAMTOR3	LAMTOR3	-1.13
		CC:intracellular		RALGAPA2	RALGAPA2	-1.34
		CC:intracellular		SH3BP5L	SH3BP5L	1.2
		CC:intracellular		ZBTB42	ZBTB42	-1.47
		CC:intracellular		GABARAP	GABARAP	-3.09
		CC:intracellular		RUNX2	RUNX2	2.05
		CC:intracellular		BLOC1S6	BLOC1S6	1.93
		CC:protein-containing complex		RNMT	RNMT	1.51
		CC:protein-containing complex		PLXNC1	PLXNC1	3.2
		CC:protein-containing complex		LAMTOR3	LAMTOR3	-1.13
		CC:protein-containing complex		BLOC1S6	BLOC1S6	1.93
		MF:binding		ZNF440	ZNF440	4.27
		MF:binding		SH3BP5L	SH3BP5L	1.2
		MF:binding		ZBTB42	ZBTB42	-1.47
		MF:binding		GABARAP	GABARAP	-3.09
		MF:binding		RUNX2	RUNX2	2.05
		MF:catalytic activity		RNMT	RNMT	1.51
		MF:catalytic activity		PDIK1L	PDIK1L	-2.86
		MF:catalytic activity		RALGAPA2	RALGAPA2	-1.34
		MF:catalytic activity		SH3BP5L	SH3BP5L	1.2
		MF:molecular function regulator		ZNF440	ZNF440	4.27
		MF:molecular function regulator		RALGAPA2	RALGAPA2	-1.34
		MF:molecular function regulator		SH3BP5L	SH3BP5L	1.2
		MF:molecular function regulator		ZBTB42	ZBTB42	-1.47
		MF:molecular function regulator		RUNX2	RUNX2	2.05
		MF:molecular transducer activity		PLXNC1	PLXNC1	3.2
		MF:transporter activity		SLC16A5	SLC16A5	-1.42
