# Supplementary material for: Alterations in gene expressions of Caco-2 cell responses to LPS and ploy(I:C) stimulation
Source: PeerJ. 2023 Jun 7;11:e15459. doi: 10.7717/peerj.15459 (PMC10257391; doi:10.7717/peerj.15459)
Supplement: Table S4 [file peerj-11-15459-s007.xlsx]

## Sheet: Sheet1
Table S4 KEGG enrichment analysis of DEGs response to LPS and poly(I:C) exposure
group	KEGG pathway			Genes	geneId	Enrichment ratio	P value
LPS	Mineral absorption	Mineral absorption	Mineral absorption	MT1F;MT1X;MT2A;MT1E	MT1F;MT1X;MT2A;MT1E	23.43	2.19e-05
	ABC transporters	ABC transporters	ABC transporters	ABCA12;ABCG1	ABCA12;ABCG1	13.58	0.0093
	TGF-beta signaling pathway	TGF-beta signaling pathway	TGF-beta signaling pathway	INHBE;CDKN2B	INHBE;CDKN2B	7.11	0.017
	Ras signaling pathway	Ras signaling pathway	Ras signaling pathway	ARF6	ARF6	3.41	0.021
poly(I:C)	Autophagy	Autophagy	Autophagy	GABARAP	GABARAP	33.34	0.0022
	Transcriptional misregulation in cancer	Transcriptional misregulation in cancer	Transcriptional misregulation in cancer	RUNX2	RUNX2	10.07	0.0052
	mTOR signaling pathway	mTOR signaling pathway	mTOR signaling pathway	LAMTOR3	LAMTOR3	28.22	0.0073
